# Supplementary material for: A Randomised, Comparative, Effectiveness Trial Evaluating Low- versus High-Level Supervision of an Exercise Intervention for Women with Breast Cancer: The SAFE Trial
Source: MDPI journal article supplement (doi:10.3390/cancers14061528), 2022-03-16
Supplement: s1 [file s1]

## Online Table S2. Key Differences Between Exercise Intervention Groups

**TITLE:** A comparative, effectiveness trial evaluating high- versus low-level supervision of an exercise intervention for women with breast cancer: the SAFE trial.

Rosalind R Spence <sup>a</sup>, Carolina X Sandler <sup>b, a, c</sup>, Benjamin Singh <sup>d</sup>, Jodie Tanner <sup>d</sup>, Christopher Pyke <sup>e, f</sup>, Elizabeth Eakin <sup>g</sup>, Dimitrios Vagenas <sup>h</sup>, Sandra C Hayes <sup>a</sup>

- a. Menzies Health Institute Queensland, Griffith University, Queensland, Australia.
- b. School of Health Sciences, University of Western Sydney, New South Wales, Australia
- c. Kirby Institute, UNSW Sydney, New South Wales, Australia.
- d. Institute of Health and Biomedical Innovation, Queensland University of Technology, Queensland, Australia
- e. Mater Health Services, South Brisbane, Queensland, Australia
- f. Mater Clinic Unit Faculty of Medicine, The University of Queensland, Queensland, Australia.
- g. School of Public Health, Faculty of Medicine, The University of Queensland, Queensland, Australia.
- h. School of Public Health and Social Work, Faculty of Health, Queensland University of Technology, Queensland, Australia

**Corresponding author:** Rosalind Spence

Mailing address: G40 Griffith Health Centre, Level 8.86 Gold Coast campus Griffith University, QLD 4222

Telephone: +61 (0)7 3735 5194

E-mail: [r.spence@griffith.edu.au](mailto:r.spence@griffith.edu.au)

**Online Resource Table S2. Key Differences Between Exercise Intervention Groups**

| Exercise Intervention<br>Characteristic                 | Exercise Intervention Groups |                        |
|---------------------------------------------------------|------------------------------|------------------------|
|                                                         | Low-supervision group        | High supervision group |
| Length of intervention, weeks                           | 12                           | 12                     |
| Total number of supervised sessions during intervention | 5                            | 20                     |
| Frequency of supervised sessions per week               |                              |                        |
| Week 1                                                  | 1                            | 2                      |
| Week 2 – 8                                              | Determined by ExP and Pt     | 2                      |
| Week 9 – 12                                             | Determined by ExP and Pt     | 1                      |

ExP: Exercise professional; Pt: participant
