# Supplementary material for: A Randomised, Comparative, Effectiveness Trial Evaluating Low- versus High-Level Supervision of an Exercise Intervention for Women with Breast Cancer: The SAFE Trial
Source: MDPI journal article supplement (doi:10.3390/cancers14061528), 2022-03-16
Supplement: s1 [file s1]

## Online Table S4: Frequency of grade 1-2 exercise-related adverse events

**TITLE:** A comparative, effectiveness trial evaluating high- versus low-level supervision of an exercise intervention for women with breast cancer: the SAFE trial.

Rosalind R Spence <sup>a</sup>, Carolina X Sandler <sup>b, a, c</sup>, Benjamin Singh <sup>d</sup>, Jodie Tanner <sup>d</sup>, Christopher Pyke <sup>e, f</sup>, Elizabeth Eakin <sup>g</sup>, Dimitrios Vagenas <sup>h</sup>, Sandra C Hayes <sup>a</sup>

- a. Menzies Health Institute Queensland, Griffith University, Queensland, Australia.
- b. School of Health Sciences, University of Western Sydney, New South Wales, Australia
- c. Kirby Institute, UNSW Sydney, New South Wales, Australia.
- d. Institute of Health and Biomedical Innovation, Queensland University of Technology, Queensland, Australia
- e. Mater Health Services, South Brisbane, Queensland, Australia
- f. Mater Clinic Unit Faculty of Medicine, The University of Queensland, Queensland, Australia.
- g. School of Public Health, Faculty of Medicine, The University of Queensland, Queensland, Australia.
- h. School of Public Health and Social Work, Faculty of Health, Queensland University of Technology, Queensland, Australia

**Corresponding author:** Rosalind Spence

Mailing address: G40 Griffith Health Centre, Level 8.86 Gold Coast campus Griffith University, QLD 4222

Telephone: +61 (0)7 3735 5194

E-mail: [r.spence@griffith.edu.au](mailto:r.spence@griffith.edu.au)

Online Resource Table S4: Frequency of grade 1-2<sup>a</sup> exercise-related adverse events

| Category / Description*                                | Total (n=126) | High (n=103) | Low (n=23) |
|--------------------------------------------------------|---------------|--------------|------------|
| <b>Musculoskeletal and connective tissue disorders</b> |               |              |            |
| Myalgia (including delayed onset muscle soreness)      | 56            | 37           | 11         |
| -Back pain                                             | 8             | 4            | 4          |
| Muscle cramp                                           | 2             | 2            | -          |
| Arthralgia                                             | 1             | 1            | -          |
| Joint effusion                                         | 1             | 1            | -          |
| <b>General Disorders</b>                               |               |              |            |
| Pain                                                   | 40            | 33           | 7          |
| Fatigue                                                | 9             | 8            | 1          |
| Edema                                                  | 2             | -            | 2          |
| Lymphoedema                                            | 2             | 2            | -          |
| Flu-like symptoms                                      | 2             | 2            | -          |
| <b>Nervous system disorders</b>                        |               |              |            |
| Headache                                               | 3             | 3            | -          |
| Dizziness                                              | 5             | 3            | 2          |
| Presyncope                                             | 1             | 1            | -          |
| <b>Respiratory disorders</b>                           |               |              |            |
| Bronchospasm                                           | 1             | 1            | -          |
| Cough                                                  | 1             | 1            | -          |
| <b>Injury</b>                                          |               |              |            |
| Bruising                                               | 1             | 1            | -          |
| Fall                                                   | 1             | 1            | -          |
| <b>Gastrointestinal disorders</b>                      |               |              |            |
| Gastroesophageal reflux disease                        | 1             | 1            | -          |
| Nausea                                                 | 2             | 2            | -          |
| <b>Skin and subcutaneous tissue disorders</b>          |               |              |            |
| Nail changes                                           | 1             | 1            | -          |
| Skin infection                                         | 1             | 1            | -          |
| <b>Other (non-CTCAE terminology)</b>                   |               |              |            |
| Cording                                                | 1             | 1            | -          |
| <b>TOTAL</b>                                           | <b>126</b>    | <b>103</b>   | <b>23</b>  |

CTCAE: Common Terminology Criteria for Adverse Events

<sup>a</sup> No grade three or above adverse events occurred during the trial
