# Supplementary material for: A Randomised, Comparative, Effectiveness Trial Evaluating Low- versus High-Level Supervision of an Exercise Intervention for Women with Breast Cancer: The SAFE Trial
Source: Cancers (Basel). 2022 Mar 16;14(6):1528. doi: 10.3390/cancers14061528 (PMC8946819; doi:10.3390/cancers14061528)
Supplement: Supplementary file 1 [file cancers-14-01528-s001.zip]

Archive with 4 entries (4 files):
- SAFE_Online Table S1_7Feb2022.pdf
- SAFE_Online Table S2_7Feb2022.pdf
- SAFE_Online Table S3_7Feb2022.pdf
- SAFE_Online Table S4_7Feb2022.pdf
